# Supplementary material for: Sustainable Bio-Based Epoxy Resins with Tunable Thermal and Mechanic Properties and Superior Anti-Corrosion Performance
Source: MDPI journal article supplement (doi:10.3390/polym15204180), 2023-10-21
Supplement: s1 [file s1]

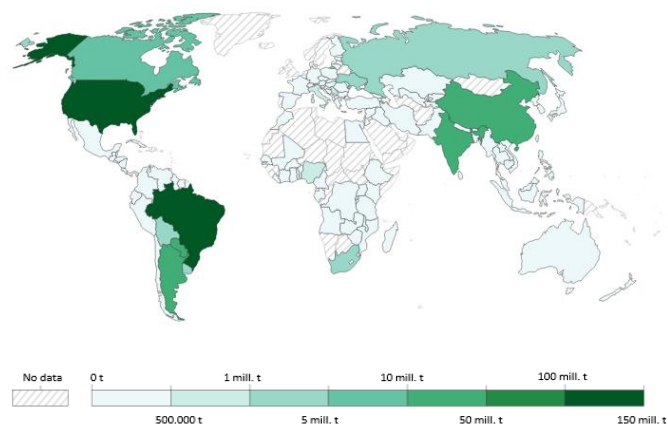

**Figure S1.** Public domain data of soy bean production (in tons) in 2021.

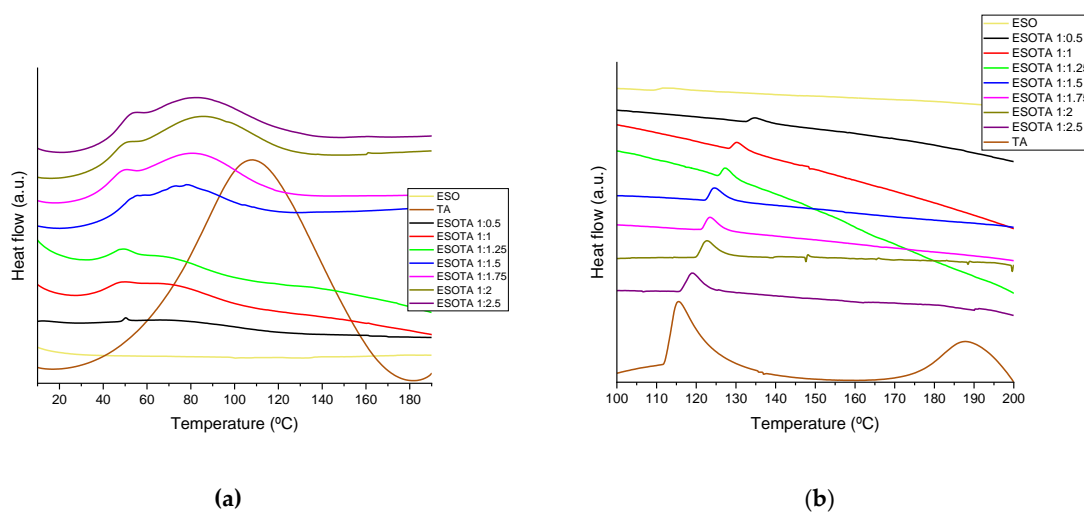

**Figure S2.** DSC thermograms recorded during: (a) 1<sup>st</sup> heating scan and (b) 2<sup>nd</sup> heating scan following the cooling of the sample.

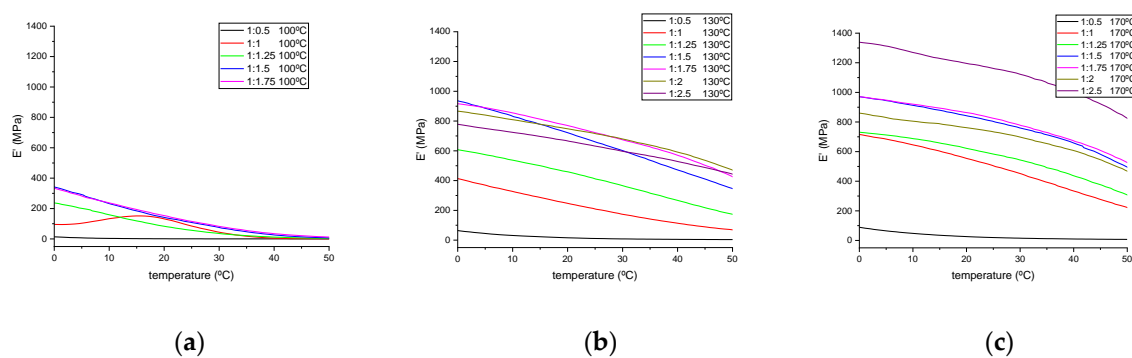

**Figure S3.** Magnification between 0 and 50 °C of the DMTA determined storage modulus plots for each sample, cured at (a) 100 °C, (b) 130 °C and (c) 170 °C.

**Table S1.** DSC results for both initial products and cured resins.

| <b>SAMPLE</b>       | <b>1<sup>ST</sup> TRANSITION<br/>(°C)</b> | <b>2<sup>ND</sup>(3<sup>RD</sup>) TRANSITION<br/>(°C)</b> |
|---------------------|-------------------------------------------|-----------------------------------------------------------|
| <b>ESO</b>          | -                                         | -                                                         |
| <b>TA</b>           | 108<br>(50.1-166.6)                       | 115.5<br>(111.9 - 123.1)<br>187.8<br>(168.1 – 200)        |
| <b>ESOTA 1:0.5</b>  | 50.1<br>(36.3 - 119.0)                    | 134.7<br>(132.6 - 140.5)                                  |
| <b>ESOTA 1:1</b>    | 50.6<br>(35.0 - 104.6)                    | 130.2<br>(128.3 - 134.8)                                  |
| <b>ESOTA 1:1.25</b> | 49.3<br>(39.1 - 99.7)                     | 127.2<br>(125.8 - 130.5)                                  |
| <b>ESOTA 1:1.5</b>  | 78.2<br>(38.6 - 111.4)                    | 124.6<br>(122.4 - 129.8)                                  |
| <b>ESOTA 1:1.75</b> | 80.5<br>(33.7 - 119.3)                    | 123.5<br>(121.5 - 128.2)                                  |
| <b>ESOTA 1:2</b>    | 85.4<br>(33.9 - 124.7)                    | 122.7<br>(120.0 - 127.5)                                  |
| <b>ESOTA 1:2.5</b>  | 82.5<br>(36.6 - 126.4)                    | 119.0<br>(116.1 - 123.5)                                  |
